# Supplementary material
Source: HighWire-hosted journal article supplement (https://bjsm.bmj.com/content/53/21/1362)
Supplement: inline-supplementary-material-1 [file inline-supplementary-material-1.docx]

**MEDLINE search details:**

((Nordic[All Fields] OR Russian[All Fields]) AND ("hamstring muscles"[MeSH Terms] OR ("hamstring"[All Fields] AND "muscles"[All Fields]) OR "hamstring muscles"[All Fields] OR "hamstring"[All Fields])) AND (injur[All Fields] OR injura[All Fields] OR injurable[All Fields] OR injural[All Fields] OR injurance[All Fields] OR injurant[All Fields] OR injurants[All Fields] OR injuray[All Fields] OR injurdata[All Fields] OR injure[All Fields] OR injure'[All Fields] OR injured[All Fields] OR injured'[All Fields] OR injured's[All Fields] OR injureda[All Fields] OR injuredbrachygobius[All Fields] OR injuredness[All Fields] OR injuredpatients[All Fields] OR injureds[All Fields] OR injureis[All Fields] OR injurer[All Fields] OR injurer's[All Fields] OR injureries[All Fields] OR injurers[All Fields] OR injurers'[All Fields] OR injures[All Fields] OR injuresat[All Fields] OR injurey[All Fields] OR injuri[All Fields] OR injuria[All Fields] OR injuriadas[All Fields] OR injuriados[All Fields] OR injuriante[All Fields] OR injuriarum[All Fields] OR injurias[All Fields] OR injuribility[All Fields] OR injurics[All Fields] OR injuridest[All Fields] OR injurie[All Fields] OR injuried[All Fields] OR injurier[All Fields] OR injuriers[All Fields] OR injuries[All Fields] OR injuries'[All Fields] OR injuries's[All Fields] OR injuries1[All Fields] OR injuries15[All Fields] OR injuriesand[All Fields] OR injuriesat[All Fields] OR injuriescommittee[All Fields] OR injuriesconflicts[All Fields] OR injuriesdagger[All Fields] OR injuriesfaculty[All Fields] OR injurieshave[All Fields] OR injuriesin[All Fields] OR injuriesof[All Fields] OR injuriesrelated[All Fields] OR injurieswere[All Fields] OR injuriies[All Fields] OR injurin[All Fields] OR injurin'[All Fields] OR injuring[All Fields] OR injuring'[All Fields] OR injurins[All Fields] OR injurins'[All Fields] OR injuriologists[All Fields] OR injurious[All Fields] OR injurious'[All Fields] OR injuriously[All Fields] OR injuriousness[All Fields] OR injurires[All Fields] OR injuris[All Fields] OR injurites[All Fields] OR injurity[All Fields] OR injuriy[All Fields] OR injurles[All Fields] OR injurof[All Fields] OR injurous[All Fields] OR injurry[All Fields] OR injurt[All Fields] OR injurty[All Fields] OR injurues[All Fields] OR injury[All Fields] OR injury'[All Fields] OR injury''[All Fields] OR injury'is[All Fields] OR injury's[All Fields] OR injury,[All Fields] OR injury13[All Fields] OR injury360[All Fields] OR injury9[All Fields] OR injury9,10[All Fields] OR injury`s[All Fields] OR injurya[All Fields] OR injuryan[All Fields] OR injuryand[All Fields] OR injuryapache[All Fields] OR injuryassociated[All Fields] OR injuryassociation[All Fields] OR injuryautologous[All Fields] OR injurybeijing[All Fields] OR injurycaremedical[All Fields] OR injurycin[All Fields] OR injuryclinodactyly[All Fields] OR injurycollaborative[All Fields] OR injurycontrol[All Fields] OR injurycta[All Fields] OR injurydagger[All Fields] OR injuryed[All Fields] OR injuryfor[All Fields] OR injuryfree[All Fields] OR injuryfuture[All Fields] OR injuryhemerocallis[All Fields] OR injuryhsp[All Fields] OR injuryies[All Fields] OR injuryimpact[All Fields] OR injuryin[All Fields] OR injuryinduced[All Fields] OR injurying[All Fields] OR injuryintervention[All Fields] OR injuryintrathecal[All Fields] OR injuryjournal[All Fields] OR injuryleads[All Fields] OR injuryliri[All Fields] OR injurymanagementpartners[All Fields] OR injuryncaa[All Fields] OR injuryprediction[All Fields] OR injuryprev[All Fields] OR injuryprevention[All Fields] OR injuryproducing[All Fields] OR injuryrats[All Fields] OR injuryreperfusion[All Fields] OR injurys[All Fields] OR injurysci[All Fields] OR injuryscore[All Fields] OR injuryserum[All Fields] OR injurystatistical[All Fields] OR injurystir[All Fields] OR injuryt'sharps[All Fields] OR injurytdermatologic[All Fields] OR injuryte[All Fields] OR injuryteam[All Fields] OR injurythan[All Fields] OR injurythe[All Fields] OR injurythymoquinone[All Fields] OR injuryto[All Fields] OR injurytrack[All Fields] OR injurytrends[All Fields] OR injurytsci[All Fields] OR injuryuch[All Fields] OR injuryupdate[All Fields] OR injurywas[All Fields] OR injurywhen[All Fields])
